# Supplementary material for: Increased Serpina3n release into circulation during glucocorticoid‐mediated muscle atrophy
Source: PubMed Central journal article supplement — J Cachexia Sarcopenia Muscle. 2018 Jul 10;9(5):929–46. doi: 10.1002/jcsm.12315 (PMC6204594; doi:10.1002/jcsm.12315), 2018-07-10
Supplement: JCSM-9-929-s001.pdf [file JCSM-9-929-s001.pdf]

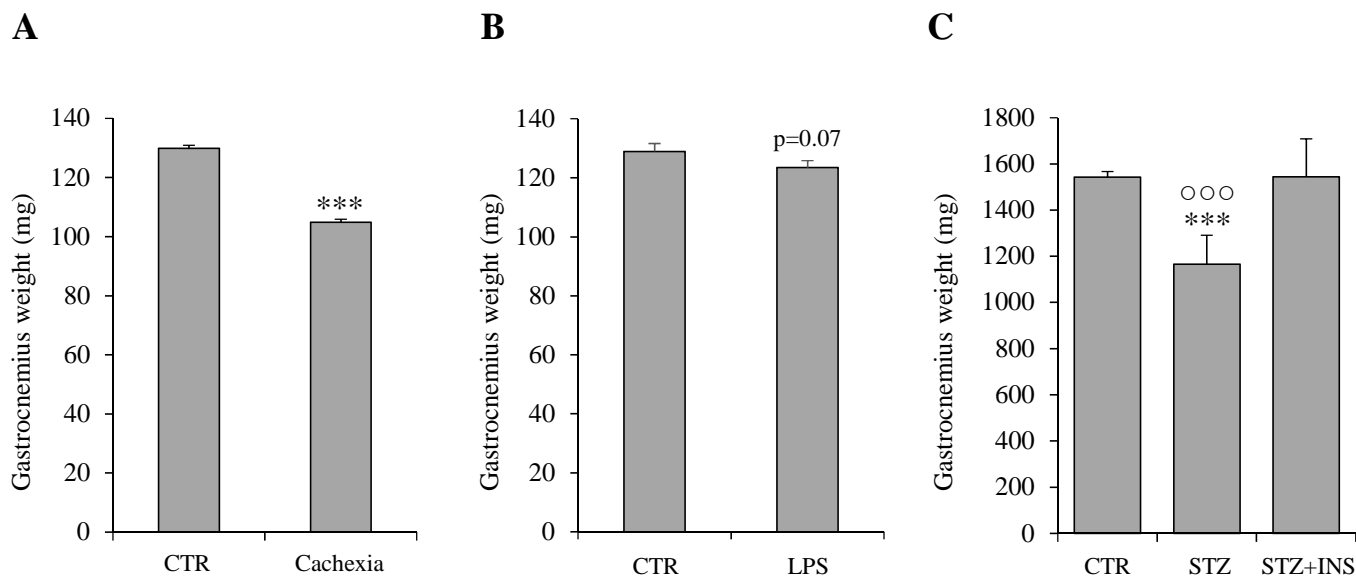

**Figure S1** Cachexia, LPS-induced sepsis and STZ-induced diabetes are associated with muscle atrophy. Gastrocnemius weight of cachectic vs CTR mice (A, n=8/group), LPS vs CTR mice (B, n=6/group), and STZ or STZ+INS vs CTR rats (C, n=6/group). Results are means  $\pm$  SE. Statistical analysis was performed using unpaired t-test or 1-way ANOVA and Tukey posttest (\*\*\*)  $p < 0.001$  vs CTR, °°°  $p < 0.001$  vs STZ+INS).

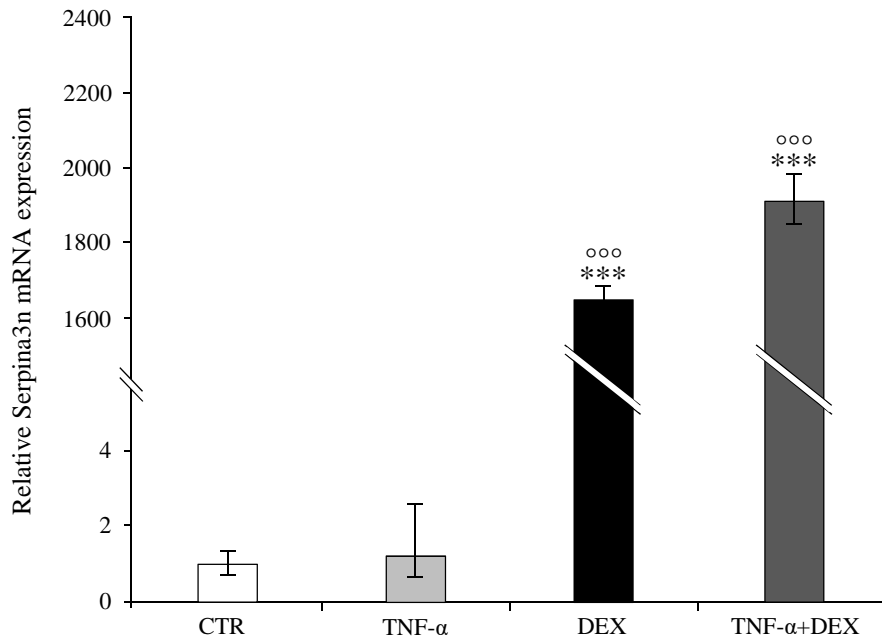

**Figure S2** TNF- $\alpha$  does not induce neither significantly potentiate the GC-induced expression of Serpina3n. Serpina3n mRNA levels of C<sub>2</sub>C<sub>12</sub> cells after 48h of dexamethasone ( $10^{-6}$ M) and/or TNF- $\alpha$  (10ng/ml) treatment. Results are means  $\pm$  SE. Statistical analysis was performed using 1-way ANOVA and Tukey posttest (\*\*\*)  $p < 0.001$  vs CTR, ooo  $p < 0.05$  vs TNF- $\alpha$ ).

**A**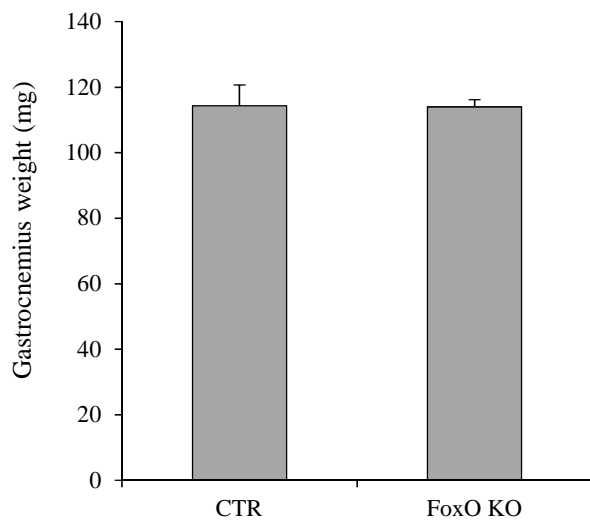**B**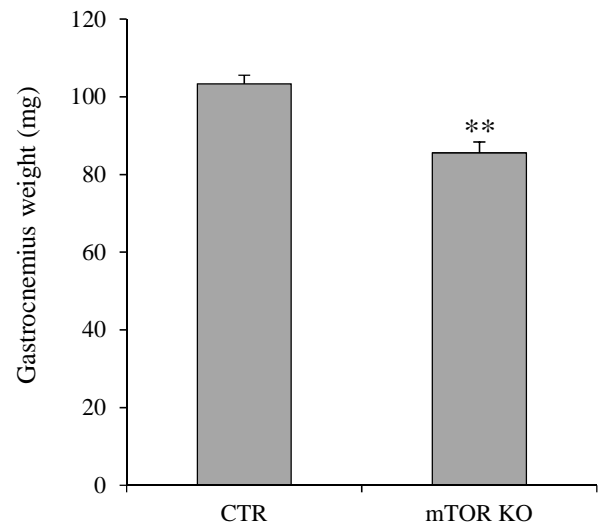

**Figure S3** mTOR inhibition, but not FoxO, are associated with muscle atrophy. Gastrocnemius weight of FoxO KO vs CTR mice (A, n=3/group), and mTOR KO vs CTR mice (B, n=3 and 5/group respectively). Results are means  $\pm$  SE. Statistical analysis was performed using unpaired t-test (\*\* p<0.01 vs CTR).

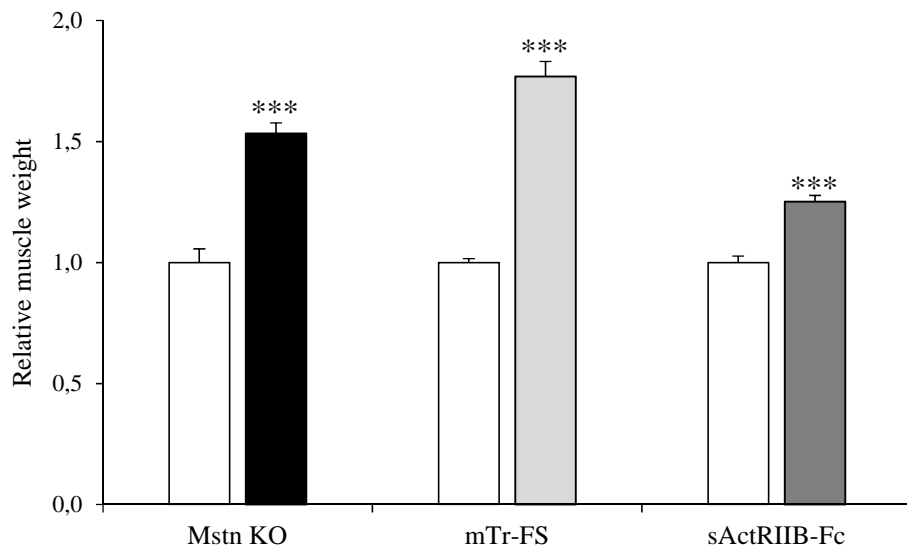

**Figure S4** Muscle hypertrophy caused by Myostatin (Mstn) inhibition. Weight of GC muscle in Mstn KO and WT mice (n=6/group), and of TA in mTr-FS (Follistatin) and WT mice (n=4/group) and in sActRIIB-treated and saline-treated mice (n=6/group). Results are means  $\pm$  SE. Statistical analysis was performed using unpaired t-test (\*\*\*)  $p < 0.001$  vs CTR or WT).

## **Supplementary method**

### **TNF- $\alpha$ treatment of C<sub>2</sub>C<sub>12</sub> myotubes**

To assess the effects of TNF- $\alpha$  treatment on Serpina3n expression, differentiated C<sub>2</sub>C<sub>12</sub> cells were treated with recombinant mouse TNF- $\alpha$  (10ng/ml, R&D Systems, Abingdon, UK) with or without DEX at 10<sup>-6</sup>M for 48h in 2% HS differentiation medium.
